# Supplementary material for: Two-Stage Spatiotemporal Time Series Modelling Approach for Rice Yield Prediction & Advanced Agroecosystem Management
Source: MDPI journal article supplement (doi:10.3390/agronomy11122502), 2021-12-09
Supplement: s1 [file s1]

# Two-Stage Spatiotemporal Time Series Modelling Approach for Rice Yield Prediction & Advanced Agroecosystem Management

Santosha Rathod <sup>1,\*</sup>, Amit Saha <sup>2</sup>, Rahul Patil <sup>3</sup>, Gabrijel Ondrasek <sup>4</sup>, Channappa Gireesh <sup>1</sup>, M. S. Anantha <sup>1</sup>,

D. V. K. Nageswara Rao<sup>1</sup>, Nirmala Bandumula <sup>1</sup>, P. Senguttuvel <sup>1</sup>, Arun Kumar Swarnaraj <sup>1</sup>, Shaik N. Meera <sup>1</sup>, Amtul Waris <sup>1</sup>, P. Jeyakumar <sup>1</sup>, Brajendra Parmar <sup>1</sup>, P. Muthuraman <sup>1</sup> and Raman Meenakshi Sundaram <sup>1</sup>

<sup>1</sup> ICAR—Indian Institute of Rice Research, Hyderabad 500030, India; giri09@gmail.com (C.G.); anugenes@gmail.com (M.S.A.); dvknrao@gmail.com (R.D.V.K.N.); bnirmaladdr@gmail.com (N.B.); senguttuvel@gmail.com (P.S.); arunswarnaraj@gmail.com (A.K.S.); shaiknmeera@gmail.com (S.N.M.); amtul.waris@gmail.com (A.W.); jeyakumarento@gmail.com (P.J.); birju1973@gmail.com (B.P.); headttrr@gmail.com (P.M.); rms\_28@rediffmail.com (R.M.S.)

<sup>2</sup> CSRTI, Central Silk Board, GOI, Mysore 57008, India; amitsahauni@gmail.com

<sup>3</sup> College of Agricultural Engineering, University of Agricultural Sciences, Raichur 584104, India; rahul1235110@gmail.com

<sup>4</sup> Faculty of Agriculture, University of Zagreb, 10000 Zagreb, Croatia; gondrasek@agr.hr

\* Correspondence: santoshagriculture@gmail.com

Table S1. Descriptive statistics of rice yield (kg/ha) data across the examined area, Andhra Pradesh, India

| Districts       | Mean    | Standard Deviation | Maximum | Minimum | CV (%) |
|-----------------|---------|--------------------|---------|---------|--------|
| Srikakulam      | 2445.10 | 755.86             | 4459.00 | 1749.00 | 30.91  |
| Vizianagaram    | 3213.55 | 1238.98            | 5697.00 | 1788.00 | 38.55  |
| Visakhapattanam | 2909.07 | 793.48             | 5101.00 | 1991.00 | 27.28  |
| Godavari_East   | 3534.45 | 1154.51            | 6000.00 | 2127.00 | 32.66  |
| Godavari_West   | 3029.26 | 947.91             | 5421.00 | 1841.00 | 31.29  |
| Krishna         | 3905.93 | 1406.61            | 6924.00 | 2239.00 | 36.01  |
| Guntur          | 3632.51 | 1113.45            | 5783.00 | 2233.00 | 30.65  |
| Prakasam        | 3670.12 | 1128.98            | 6279.00 | 2521.40 | 30.76  |
| Nellore         | 3659.06 | 1190.50            | 6318.00 | 2585.00 | 32.54  |
| YSR             | 3798.00 | 1352.61            | 6705.00 | 2347.00 | 35.61  |
| Karnool         | 3925.21 | 1288.62            | 6723.00 | 2489.00 | 32.83  |
| Ananthpuramu    | 2675.03 | 906.94             | 4829.00 | 1434.00 | 33.90  |
| Chittoor        | 1829.37 | 703.20             | 3614.00 | 1076.00 | 38.44  |

Table S2. Coordinate matrix for districts of A.P. India

| District        | Longitude | Latitude |
|-----------------|-----------|----------|
| Srikakulam      | 83.89°E   | 18.29°N  |
| Vizianagaram    | 83.39°E   | 18.1°N   |
| Visakhapattanam | 83.21°E   | 17.68°N  |
| Godavari_East   | 82.04°E   | 17.32°N  |
| Godavari_West   | 81.33°E   | 16.91°N  |
| Krishna         | 80.72°E   | 16.61°N  |
| Guntur          | 80.43°E   | 16.3°N   |
| Prakasam        | 79.56°E   | 15.34°N  |
| Nellore         | 79.98°E   | 14.44°N  |
| YSR             | 78.72°E   | 14.46°N  |
| Karnool         | 78.03°E   | 15.82°N  |
| Ananthpuramu    | 77.6°E    | 14.68°N  |
| Chittor         | 79.1°E    | 13.21°N  |

Table S3. Nearest neighbours for each districts of A.P. India

| District        | Nearest neighbour |
|-----------------|-------------------|
| Srikakulam      | Vizainagaram      |
| Vizianagaram    | Visakhapattanam   |
| Visakhapattanam | Vizainagaram      |
| Godavari_East   | Godavari_West     |
| Godavari_West   | Krishna           |
| Krishna         | Guntur            |
| Guntur          | Krishna           |
| Prakasam        | Nellore           |
| Nellore         | Prakasam          |
| YSR             | Ananthpuramu      |
| Karnool         | Ananthpuramu      |
| Ananthpuramu    | YSR               |
| Chittor         | YSR               |

Table S4. Zero order weight matrix among examined districts

|     | D1 | D2 | D3 | D4 | D5 | D6 | D7 | D8 | D9 | D10 | D11 | D12 | D13 |
|-----|----|----|----|----|----|----|----|----|----|-----|-----|-----|-----|
| D1  | 1  | 0  | 0  | 0  | 0  | 0  | 0  | 0  | 0  | 0   | 0   | 0   | 0   |
| D2  | 0  | 1  | 0  | 0  | 0  | 0  | 0  | 0  | 0  | 0   | 0   | 0   | 0   |
| D3  | 0  | 0  | 1  | 0  | 0  | 0  | 0  | 0  | 0  | 0   | 0   | 0   | 0   |
| D4  | 0  | 0  | 0  | 1  | 0  | 0  | 0  | 0  | 0  | 0   | 0   | 0   | 0   |
| D5  | 0  | 0  | 0  | 0  | 1  | 0  | 0  | 0  | 0  | 0   | 0   | 0   | 0   |
| D6  | 0  | 0  | 0  | 0  | 0  | 1  | 0  | 0  | 0  | 0   | 0   | 0   | 0   |
| D7  | 0  | 0  | 0  | 0  | 0  | 0  | 1  | 0  | 0  | 0   | 0   | 0   | 0   |
| D8  | 0  | 0  | 0  | 0  | 0  | 0  | 0  | 1  | 0  | 0   | 0   | 0   | 0   |
| D9  | 0  | 0  | 0  | 0  | 0  | 0  | 0  | 0  | 1  | 0   | 0   | 0   | 0   |
| D10 | 0  | 0  | 0  | 0  | 0  | 0  | 0  | 0  | 0  | 1   | 0   | 0   | 0   |
| D11 | 0  | 0  | 0  | 0  | 0  | 0  | 0  | 0  | 0  | 0   | 1   | 0   | 0   |
| D12 | 0  | 0  | 0  | 0  | 0  | 0  | 0  | 0  | 0  | 0   | 0   | 1   | 0   |
| D13 | 0  | 0  | 0  | 0  | 0  | 0  | 0  | 0  | 0  | 0   | 0   | 0   | 1   |

D1 to D13 indicates different districts considered D1: Srikakulam, D2: Vizainagaram, D3: Visakhapattanam, D4: Godavari\_East, D5: Godavari\_West, D6: Krishna, D7: Guntur, D8: Prakasam, D9: Nellore, D10: YSR, D11: Karnool, D12: Ananthpuramu, D13: Chittor

Table S5: First order uniform spatial weight matrix

|     | D1  | D2  | D3  | D4  | D5  | D6  | D7   | D8   | D9   | D10  | D11  | D12  | D13  |
|-----|-----|-----|-----|-----|-----|-----|------|------|------|------|------|------|------|
| D1  | 0   | 1   | 0   | 0   | 0   | 0   | 0    | 0    | 0    | 0    | 0    | 0    | 0    |
| D2  | 0.5 | 0   | 0.5 | 0   | 0   | 0   | 0    | 0    | 0    | 0    | 0    | 0    | 0    |
| D3  | 0   | 0.5 | 0   | 0.5 | 0   | 0   | 0    | 0    | 0    | 0    | 0    | 0    | 0    |
| D4  | 0   | 0   | 0.5 | 0   | 0.5 | 0   | 0    | 0    | 0    | 0    | 0    | 0    | 0    |
| D5  | 0   | 0   | 0   | 0.5 | 0   | 0.5 | 0    | 0    | 0    | 0    | 0    | 0    | 0    |
| D6  | 0   | 0   | 0   | 0   | 0.5 | 0   | 0.5  | 0    | 0    | 0    | 0    | 0    | 0    |
| D7  | 0   | 0   | 0   | 0   | 0   | 0.5 | 0    | 0.5  | 0    | 0    | 0    | 0    | 0    |
| D8  | 0   | 0   | 0   | 0   | 0   | 0   | 0.25 | 0    | 0.25 | 0.25 | 0.25 | 0    | 0    |
| D9  | 0   | 0   | 0   | 0   | 0   | 0   | 0    | 0.33 | 0    | 0.33 | 0    | 0    | 0.33 |
| D10 | 0   | 0   | 0   | 0   | 0   | 0   | 0    | 0.2  | 0.2  | 0    | 0.2  | 0.2  | 0.2  |
| D11 | 0   | 0   | 0   | 0   | 0   | 0   | 0    | 0.33 | 0    | 0.33 | 0    | 0.33 | 0    |
| D12 | 0   | 0   | 0   | 0   | 0   | 0   | 0    | 0    | 0    | 0.33 | 0.33 | 0    | 0.33 |
| D13 | 0   | 0   | 0   | 0   | 0   | 0   | 0    | 0    | 0.33 | 0.33 | 0    | 0.33 | 0    |

D1 to D13 indicates different districts considered D1: Srikakulam, D2: Vizainagaram, D3: Visakhapattanam, D4: Godavari\_East, D5: Godavari\_West, D6: Krishna, D7: Guntur, D8: Prakasam, D9: Nellore, D10: YSR, D11: Karnool, D12: Ananthpuramu, D13: Chittor

Table S6: Second order uniform spatial weight matrix

|     | D1   | D2   | D3   | D4   | D5   | D6   | D7   | D8   | D9   | D10  | D11  | D12  | D13  |
|-----|------|------|------|------|------|------|------|------|------|------|------|------|------|
| D1  | 0    | 0.5  | 0.5  | 0    | 0    | 0    | 0    | 0    | 0    | 0    | 0    | 0    | 0    |
| D2  | 0.33 | 0    | 0.33 | 0.33 | 0    | 0    | 0    | 0    | 0    | 0    | 0    | 0    | 0    |
| D3  | 0.25 | 0.25 | 0    | 0.25 | 0.25 | 0    | 0    | 0    | 0    | 0    | 0    | 0    | 0    |
| D4  | 0    | 0.25 | 0.25 | 0    | 0.25 | 0.25 | 0    | 0    | 0    | 0    | 0    | 0    | 0    |
| D5  | 0    | 0    | 0.25 | 0.25 | 0    | 0.25 | 0.25 | 0    | 0    | 0    | 0    | 0    | 0    |
| D6  | 0    | 0    | 0    | 0.25 | 0.25 | 0    | 0.25 | 0.25 | 0    | 0    | 0    | 0    | 0    |
| D7  | 0    | 0    | 0    | 0    | 0    | 0.17 | 0    | 0.17 | 0.17 | 0.17 | 0.17 | 0    | 0    |
| D8  | 0    | 0    | 0    | 0    | 0    | 0.14 | 0.14 | 0    | 0.14 | 0.14 | 0.14 | 0.14 | 0.14 |
| D9  | 0    | 0    | 0    | 0    | 0    | 0    | 0.17 | 0.17 | 0    | 0.17 | 0.17 | 0.17 | 0.17 |
| D10 | 0    | 0    | 0    | 0    | 0    | 0    | 0.17 | 0.17 | 0.17 | 0    | 0.17 | 0.17 | 0.17 |
| D11 | 0    | 0    | 0    | 0    | 0    | 0    | 0.17 | 0.17 | 0.17 | 0.17 | 0    | 0.17 | 0.17 |
| D12 | 0    | 0    | 0    | 0    | 0    | 0    | 0.17 | 0.17 | 0.17 | 0.17 | 0.17 | 0    | 0.17 |
| D13 | 0    | 0    | 0    | 0    | 0    | 0    | 0    | 0.2  | 0.2  | 0.2  | 0.2  | 0.2  | 0    |

D1 to D13 indicates different districts considered D1: Srikakulam, D2: Vizainagaram, D3: Visakhapattanam, D4: Godavari\_East, D5: Godavari\_West, D6: Krishna, D7: Guntur, D8: Prakasam, D9: Nellore, D10: YSR, D11: Karnool, D12: Ananthpuramu, D13: Chittor

Table S7: Third order uniform spatial weight matrix

|     | D1   | D2   | D3   | D4   | D5   | D6   | D7   | D8   | D9   | D10  | D11  | D12  | D13  |
|-----|------|------|------|------|------|------|------|------|------|------|------|------|------|
| D1  | 0    | 0.33 | 0.33 | 0.33 | 0    | 0    | 0    | 0    | 0    | 0    | 0    | 0    | 0    |
| D2  | 0.25 | 0    | 0.25 | 0.25 | 0.25 | 0    | 0    | 0    | 0    | 0    | 0    | 0    | 0    |
| D3  | 0.2  | 0    | 0.2  | 0.2  | 0.2  | 0.2  | 0    | 0    | 0    | 0    | 0    | 0    | 0    |
| D4  | 0.17 | 0.17 | 0.17 | 0    | 0.17 | 0.17 | 0.17 | 0    | 0    | 0    | 0    | 0    | 0    |
| D5  | 0    | 0.17 | 0.17 | 0.17 | 0    | 0.17 | 0.17 | 0.17 | 0    | 0    | 0    | 0    | 0    |
| D6  | 0    | 0    | 0.14 | 0.14 | 0.14 | 0    | 0.14 | 0.14 | 0.14 | 0.14 | 0    | 0    | 0    |
| D7  | 0    | 0    | 0    | 0.11 | 0.11 | 0.11 | 0    | 0.11 | 0.11 | 0.11 | 0.11 | 0.11 | 0.11 |
| D8  | 0    | 0    | 0    | 0    | 0.12 | 0.12 | 0.12 | 0    | 0.12 | 0.12 | 0.12 | 0.12 | 0.12 |
| D9  | 0    | 0    | 0    | 0    | 0    | 0.14 | 0.14 | 0.14 | 0    | 0.14 | 0.14 | 0.14 | 0.14 |
| D10 | 0    | 0    | 0    | 0    | 0    | 0.14 | 0.14 | 0.14 | 0.14 | 0    | 0.14 | 0.14 | 0.14 |
| D11 | 0    | 0    | 0    | 0    | 0    | 0.14 | 0.14 | 0.14 | 0.14 | 0.14 | 0    | 0.14 | 0.14 |
| D12 | 0    | 0    | 0    | 0    | 0    | 0    | 0.17 | 0.17 | 0.17 | 0.17 | 0.17 | 0    | 0.17 |
| D13 | 0    | 0    | 0    | 0    | 0    | 0    | 0.17 | 0.17 | 0.17 | 0.17 | 0.17 | 0.17 | 0    |

D1 to D13 indicates different districts considered D1: Srikakulam, D2: Vizainagaram, D3: Visakhapattanam, D4: Godavari\_East, D5: Godavari\_West, D6: Krishna, D7: Guntur, D8: Prakasam, D9: Nellore, D10: YSR, D11: Karnool, D12: Ananthpuramu, D13: Chittor

Table S8. TDNN model parameter specifications for STARMA ( $\phi_{10}, \phi_{11}, \theta_{11}$ ) residuals series

| District        | Parameters                 |            |
|-----------------|----------------------------|------------|
| Srikakulam      | 2-4-1 Networks, 17 Weights | TDNN(2,4)  |
| Vizianagaram    | 2-3-1 Networks, 13 Weights | TDNN(2,3)  |
| Visakhapattanam | 1-3-1 Networks, 10 Weights | TDNN (1,3) |
| Godavari_East   | 1-4-1 Networks, 13 Weights | TDNN (1,4) |
| Godavari_West   | 1-4-1 Networks, 13 Weights | TDNN (1,4) |
| Krishna         | 2-4-1 Networks, 17 Weights | TDNN (2,4) |
| Guntur          | 1-3-1 Networks, 10 Weights | TDNN (1,3) |
| Prakasam        | 2-3-1 Networks, 13 Weights | TDNN (2,3) |
| Nellore         | 1-4-1 Networks, 13 Weights | TDNN (1,4) |
| YSR             | 2-3-1 Networks, 13 Weights | TDNN (2,3) |
| Karnool         | 2-4-1 Networks, 13 Weights | TDNN (2,3) |
| Ananthpuramu    | 2-3-1 Networks, 13 Weights | TDNN (2,3) |
| Chittoor        | 2-3-1 Networks, 13 Weights | TDNN (2,3) |

Table S9a: Out of sample forecasts obtained by different methods

| Year    | Srikakulam      |          |         |           | Vizianagaram  |          |         |           |
|---------|-----------------|----------|---------|-----------|---------------|----------|---------|-----------|
|         | Actual          | Forecast |         |           | Actual        | Forecast |         |           |
|         |                 | ARIMA    | STARMA  | STARMA-II |               | ARIMA    | STARMA  | STARMA-II |
| 2016-17 | 4459            | 2195.43  | 3503.38 | 5345.81   | 4556          | 2297.62  | 4078.12 | 4470.03   |
| 017-18  | 3795            | 2195.43  | 3754.46 | 3904.23   | 4479          | 2297.62  | 4029.22 | 4470.03   |
| 2018-19 | 3117            | 2195.43  | 2520.25 | 3450.88   | 3540          | 2297.62  | 4211.23 | 4470.038  |
| 2019-20 | 4277            | 2195.43  | 3490.58 | 4819.53   | 4829          | 2297.62  | 4268.22 | 4470.03   |
| Year    | Visakhapattanam |          |         |           | Godavari_East |          |         |           |
|         | Actual          | Forecast |         |           | Actual        | Forecast |         |           |
|         |                 | ARIMA    | STARMA  | STARMA-II |               | ARIMA    | STARMA  | STARMA-II |
| 2016-17 | 3365            | 1659.9   | 2710.34 | 2926.4    | 6356          | 3966     | 5587.5  | 5777.56   |
| 2017-18 | 3150            | 1659.9   | 2765.66 | 2979.03   | 6491          | 3966     | 5538.2  | 5711.78   |
| 2018-19 | 2568            | 1659.9   | 2893.41 | 2708.53   | 6705          | 3966     | 5976.14 | 6108.58   |
| 2019-20 | 3614            | 1659.9   | 2887.44 | 3061.8    | 6318          | 3966     | 6002.11 | 6018.22   |
| Year    | Godavari_West   |          |         |           | Krishna       |          |         |           |
|         | Actual          | Forecast |         |           | Actual        | Forecast |         |           |
|         |                 | ARIMA    | STARMA  | STARMA-II |               | ARIMA    | STARMA  | STARMA-II |
| 2016-17 | 6257            | 4071     | 5353.35 | 5897.56   | 5819          | 3149.61  | 5169.32 | 5521.58   |
| 2017-18 | 6461            | 4071     | 5317.97 | 5911.78   | 5983          | 3149.61  | 5296.75 | 5611.29   |
| 2018-19 | 6594            | 4071     | 5829.65 | 6108.58   | 6279          | 3149.61  | 5590.66 | 5789.44   |
| 2019-20 | 6723            | 4071     | 6001.28 | 6298.22   | 6006          | 3149.61  | 5598.74 | 5797.55   |
| Year    | Guntur          |          |         |           | Prakasam      |          |         |           |
|         |                 |          |         |           |               |          |         |           |

|         | Nellore |          |         |           | YSR    |          |         |           |
|---------|---------|----------|---------|-----------|--------|----------|---------|-----------|
|         | Actual  | Forecast |         |           | Actual | Forecast |         |           |
| Year    |         | ARIMA    | STARMA  | STARMA-II |        | ARIMA    | STARMA  | STARMA-II |
| 2016-17 | 6271    | 3277.05  | 5342.35 | 5387.25   | 5386   | 3131.78  | 4282.47 | 4889.96   |
| 2017-18 | 6318    | 3217.1   | 5447.76 | 5508.96   | 5752   | 3131.78  | 4724.77 | 5239.8    |
| 2018-19 | 5950    | 3277.05  | 5585.63 | 5686.33   | 5254   | 3131.78  | 4912.35 | 5684.76   |
| 2019-20 | 5977    | 3217.1   | 5589.66 | 5601.88   | 5658   | 3131.78  | 5228.99 | 5718.41   |

Table S9b: Out of sample forecasts obtained by different methods

| Year    | Karnool |          |         |           | Ananthpuramu |          |         |           |
|---------|---------|----------|---------|-----------|--------------|----------|---------|-----------|
|         | Actual  | Forecast |         |           | Actual       | Forecast |         |           |
|         |         | ARIMA    | STARMA  | STARMA-II |              | ARIMA    | STARMA  | STARMA-II |
| 2016-17 | 6000    | 3053.78  | 4577.21 | 4852.77   | 3764         | 2613.63  | 3317.68 | 3955.56   |
| 2017-18 | 5326    | 3053.78  | 4655.47 | 4958.32   | 4190         | 2613.63  | 3269.82 | 3866.32   |
| 2018-19 | 5746    | 3053.78  | 4980.27 | 5789.87   | 3933         | 2613.63  | 3689.54 | 4690.87   |
| 2019-20 | 5942    | 3053     | 5455.23 | 5888.98   | 5101         | 2613.63  | 4186.33 | 4670.28   |

  

| Year    | Chittoor |          |         |           |
|---------|----------|----------|---------|-----------|
|         | Actual   | Forecast |         |           |
|         |          | ARIMA    | STARMA  | STARMA-II |
| 2016-17 | 5467     | 2667.04  | 4478.76 | 4855.65   |
| 2017-18 | 5697     | 2667.04  | 4735.18 | 4983.82   |
| 2018-19 | 5454     | 2667.04  | 4856.47 | 5093.12   |
| 2019-20 | 5513     | 2667.04  | 4887.66 | 5158.88   |
